# Supplementary material for: Distribution of multidrug-resistant bacterial infections in diabetic foot ulcers and risk factors for drug resistance: a retrospective analysis
Source: PeerJ. 2023 Oct 9;11:e16162. doi: 10.7717/peerj.16162 (PMC10569182; doi:10.7717/peerj.16162)
Supplement: Data S1 [file peerj-11-16162-s001.xlsx]

## Sheet: Sheet1
MDROs Group
Serial number	Gender	Age	Hospital stays (days)	Infecting bacteria	History of diabetes	Cholesterol	TG(mmol/L)	HbA1c（%）	Systolic pressure	Diastolic pressure（mmHg）	ESR(mm/h)	CRP(mg/L)	PCT(pg/ml)	ABI	Wagne gade	Previous history of antimicrobial exposure	Osteomyelitis	Peripheral neuropathy	Neuroischemic wounds	Diabetic Nephropathy	Retinopathy	Hospitalization for the same ulcer >2 times/year	Toe/Limb amputation
1	Male	39	32	Staphylococcus aureus（MDROs）	3	5.79	2.42	13.3	118	72	33.82	11.89	218	1.06	1	No	No	Yes	No	Yes	No	No	No
2	Male	51	28	Staphylococcus aureus（MDROs）	6	4.38	1.27	10.2	132	75	36.78	15.91	230	1.12	2	Yes	No	Yes	No	No	No	No	No
3	Male	56	89	Staphylococcus aureus（MDROs）	25	5.72	1.78	8.3	162	84	53.55	22.46	263	0.67	3	Yes	Yes	Yes	Yes	Yes	Yes	Yes	No
4	Female	54	17	Staphylococcus aureus（MDROs）	6	3.81	0.76	5.4	128	76	58.95	18.92	189	1.12	2	Yes	No	Yes	No	No	No	No	No
5	Female	32	6	Staphylococcus aureus（MDROs）	11	3.28	1.99	7.4	109	72	70.64	26.97	246	0.66	3	Yes	Yes	Yes	Yes	No	No	No	No
6	Male	51	23	Staphylococcus aureus（MDROs）	4	4.76	1.06	13.3	124	83	45.48	32.41	243	0.79	2	Yes	No	No	No	No	No	No	No
7	Female	54	14	Staphylococcus aureus（MDROs）	20	6.99	2.07	11.6	140	73	86.79	58.98	290	0.37	4	Yes	Yes	Yes	Yes	Yes	Yes	Yes	Yes
8	Female	54	23	Staphylococcus aureus （MDROs）	10	3.79	1.08	6.2	142	81	103.88	47.32	278	1.08	3	Yes	Yes	Yes	Yes	No	No	No	No
9	Female	58	11	Staphylococcus aureus（MDROs）	7	7.23	2.74	9.3	133	74	38.39	43.08	187	0.78	1	Yes	No	No	No	Yes	Yes	No	No
10	Male	57	10	Staphylococcus aureus（MDROs）	11	4.89	1.46	6.8	166	95	63.31	31.48	246	0.84	3	Yes	Yes	Yes	Yes	No	No	No	No
11	Female	63	11	Staphylococcus aureus（MDROs）	15	5.23	1.63	6.4	159	86	75.54	29.8	249	0.43	4	Yes	Yes	Yes	Yes	Yes	No	Yes	No
12	Male	82	15	Staphylococcus aureus（MDROs）	28	6.45	2.08	8.6	162	98	136.87	74.65	359	0.32	5	Yes	Yes	Yes	Yes	Yes	Yes	No	Yes
13	Male	72	16	Staphylococcus aureus（MDROs）	16	4.87	1.84	8.3	166	104	76.47	36.89	284	0.64	3	Yes	Yes	Yes	Yes	Yes	No	No	No
14	Male	71	17	Staphylococcus aureus（MDROs）	11	4.97	1.41	7.2	167	102	45.64	40.08	197	0.98	2	Yes	Yes	Yes	No	Yes	No	No	No
15	Male	75	14	Staphylococcus aureus/（MDROs）	10	3.59	1.36	7.8	170	82	75.33	53.26	267	0.68	3	Yes	Yes	Yes	Yes	No	No	No	No
16	Female	80	31	Staphylococcus aureus/（MDROs）	20	5.89	1.69	9.4	166	73	64.07	36.18	258	0.56	3	Yes	Yes	Yes	Yes	Yes	Yes	No	No
17	Female	53	29	Staphylococcus aureus/（MDROs）	20	5.47	2.03	8.9	128	84	89.6	66.48	322	0.28	5	Yes	Yes	Yes	Yes	Yes	Yes	Yes	Yes
18	Female	42	35	Staphylococcus aureus/（MDROs）	4	4.22	0.94	9.6	116	82	70.71	43.87	263	0.75	3	Yes	No	Yes	Yes	No	No	No	No
19	Male	39	21	Staphylococcus aureus（MDROs）	1	3.12	1.04	6.3	124	76	31.16	21.09	184	1.13	1	No	No	No	No	No	No	No	No
20	Female	66	21	Staphylococcus aureus/（MDROs）	14	4.93	1.66	7.2	154	89	56.83	46.89	289	0.86	3	Yes	Yes	Yes	Yes	Yes	No	No	No
21	Male	58	35	Staphylococcus aureus/（MDROs）	7	4.17	0.92	5.8	165	84	67.38	38.68	263	0.97	3	Yes	Yes	Yes	Yes	No	No	No	No
22	Male	79	8	Staphylococcus aureus/（MDROs）	22	5.69	1.82	9.7	167	108	73.2	53.98	305	0.58	4	Yes	Yes	Yes	Yes	Yes	Yes	Yes	Yes
23	Female	63	10	Staphylococcus aureus/ （MDROs）	18	2.84	0.73	8.9	124	76	62.64	32.08	246	0.97	3	Yes	Yes	Yes	Yes	Yes	No	No	No
24	Male	73	26	Staphylococcus aureus/（MDROs）	18	6.56	1.61	11.7	159	98	88.68	61.03	376	0.46	4	Yes	Yes	Yes	Yes	Yes	Yes	Yes	Yes
25	Female	66	18	Staphylococcus aureus/（MDROs）	9	3.06	1.43	7.5	127	79	75.1	48.07	384	0.48	4	Yes	Yes	Yes	Yes	No	No	No	No
26	Male	72	15	Staphylococcus aureus/（MDROs）	14	4.17	0.84	8	148	85	69.84	37.06	264	0.66	3	Yes	Yes	Yes	Yes	Yes	No	No	No
27	Female	50	11	Staphylococcus aureus/（MDROs）	4	2.28	0.47	9.3	116	74	32.78	22.1	248	1.07	1	Yes	No	No	No	No	No	No	No
28	Male	72	13	Staphylococcus aureus/（MDROs）	15	4.3	1.07	7.4	174	103	89.79	20.09	257	0.76	3	Yes	Yes	Yes	Yes	Yes	No	No	No
29	Female	54	10	Staphylococcus aureus/（MDROs）	6	4.96	0.88	9.6	126	79	24.33	30.66	265	1.05	2	Yes	No	Yes	No	No	No	No	No
30	Male	68	23	Staphylococcus aureus/（MDROs）	15	3.58	1.38	8.3	131	73	80.67	42.25	276	0.89	3	Yes	Yes	Yes	Yes	No	No	No	No
31	Male	73	19	Staphylococcus aureus/（MDROs）	17	4.73	1.57	7.7	167	95	48.64	40.99	225	0.74	3	Yes	Yes	Yes	Yes	No	No	No	No
32	Male	86	22	Staphylococcus aureus/（MDROs）	22	5.96	0.94	9.3	176	93	68.65	39.75	246	0.66	3	Yes	Yes	Yes	Yes	No	No	No	No
33	Male	67	19	Staphylococcus aureus/（MDROs）	9	4.86	1.52	7.9	126	74	73.2	29.08	238	0.78	3	Yes	Yes	Yes	Yes	No	No	No	No
34	Female	82	10	E. coli（MDROs）	25	3.31	1.46	11.7	187	104	57.48	46.8	318	0.49	4	Yes	Yes	Yes	Yes	Yes	Yes	Yes	Yes
35	Male	65	22	E. coli（MDROs）	15	4.9	1.73	7.3	150	89	37.96	18.45	206	1.17	1	No	No	Yes	No	No	No	No	No
36	Male	62	21	E. coli（MDROs）	3	3.72	0.86	7.1	145	93	23.28	46.29	208	0.68	3	Yes	Yes	No	Yes	No	No	No	No
37	Male	67	23	E. coli（MDROs）、Staphylococcus haemolyticus	15	2.53	1.17	9.5	165	99	69.4	38.43	263	0.56	3	Yes	Yes	Yes	Yes	Yes	No	No	No
38	Female	69	14	E. coli（MDROs）	21	4.72	0.81	8.1	175	74	78.49	36.74	254	0.45	3	Yes	Yes	Yes	Yes	Yes	Yes	No	Yes
39	Female	70	16	E. coli（MDROs）	8	4.86	1.03	10.7	148	82	61.27	22.17	229	0.84	2	No	No	No	No	No	No	No	No
40	Male	49	46	E. coli（MDROs）	8	4.79	1.86	7.9	126	78	93.46	32.08	231	0.57	3	Yes	Yes	Yes	No	No	No	No	No
41	Female	68	41	E. coli（MDROs）	20	3.32	0.84	11.4	170	78	81.06	65.54	261	0.35	4	Yes	Yes	Yes	Yes	Yes	Yes	Yes	Yes
42	Male	70	12	E. coli (MDROs)	6	3.16	0.83	6.3	164	99	68.48	36.72	251	0.49	3	Yes	Yes	Yes	Yes	No	No	Yes	No
43	Female	51	24	E. coli（MDROs）	5	3.82	0.63	11.4	149	75	62.78	22.68	365	0.67	3	Yes	Yes	No	No	No	No	No	No
44	Female	85	27	E. coli（MDROs）	27	7.48	2.36	9.8	168	94	69.19	36.02	278	0.58	3	Yes	Yes	Yes	Yes	Yes	Yes	No	No
45	Male	61	41	E. coli（MDROs）	4	5.73	0.79	11.4	106	74	33.57	18.74	222	1.05	1	No	No	No	No	No	No	No	No
46	Male	81	21	E. coli（MDROs）	23	5.45	1.06	8.7	163	94	109.89	56.93	398	0.41	4	Yes	Yes	Yes	Yes	Yes	Yes	No	Yes
47	Male	54	2	E. coli（MDROs）	9	4.73	1.74	10.4	112	71	87.75	60.23	289	0.55	3	Yes	Yes	Yes	Yes	No	No	No	No
48	Female	76	10	E. coli（MDROs）	19	5.36	1.34	9.3	168	95	63.21	27.84	265	0.97	2	Yes	Yes	Yes	No	Yes	Yes	Yes	No
49	Male	66	18	E. coli（MDROs）	12	5.32	1.45	7.4	145	76	98.06	69.45	324	0.52	4	Yes	Yes	Yes	Yes	No	No	No	Yes
50	Female	58	64	Klebsiella pneumoniae pneumonia subspeciess（MDROs）	4	4.05	1.65	12.6	132	71	28.07	33.85	254	0.98	2	Yes	No	Yes	No	Yes	No	No	No
51	Female	61	12	Klebsiella pneumoniae pneumonia subspeciess（MDROs）	8	3.54	0.76	6.9	159	95	79.68	42.47	275	0.87	3	Yes	Yes	Yes	Yes	No	No	No	No
52	Male	69	46	Klebsiella pneumoniae pneumonia subspeciess（MDROs）	18	5.54	0.49	8.4	130	71	68.93	41.06	285	0.56	3	Yes	Yes	Yes	Yes	Yes	Yes	Yes	No
53	Male	65	20	Klebsiella pneumoniae pneumonia subspeciess（MDROs）、 E. coli	13	6.11	1.36	8.9	151	95	89.07	77.4	307	0.48	4	Yes	No	Yes	Yes	Yes	No	No	Yes
54	Male	64	16	Klebsiella pneumoniae pneumonia subspeciess/（MDROs）	10	3.58	2.13	8.6	157	84	10.66	30.16	206	1.09	1	Yes	Yes	Yes	No	No	No	No	No
55	Male	69	59	P. aeruginosa(MDROs)	30	4.25	1.78	9.7	132	86	120.63	106.04	318	0.33	5	Yes	Yes	Yes	Yes	Yes	Yes	Yes	Yes
56	Male	37	15	P. aeruginosa(MDROs)	5	3.18	1.18	7.8	127	77	75.56	44.78	254	0.67	3	Yes	Yes	Yes	Yes	No	No	No	No
57	Female	74	13	P. aeruginosa(MDROs)	2	4.77	1.91	14.6	135	68	53.68	35.28	228	0.88	2	Yes	No	Yes	No	No	No	No	No
58	Female	57	30	P. aeruginosa(MDROs)	3	2.78	0.56	7.8	154	95	17.92	28.05	256	1.08	1	No	No	No	No	No	No	No	No
59	Male	67	12	P. aeruginosa(MDROs)	18	7.12	2.94	9.6	148	76	66.84	54.73	273	0.74	3	Yes	Yes	Yes	Yes	Yes	Yes	Yes	Yes
60	Male	53	26	P. aeruginosa(MDROs)	7	3.37	0.68	8.4	137	74	37.58	19.74	216	1.07	1	Yes	No	Yes	No	No	No	No	No
61	Male	72	22	P. aeruginosa(MDROs)	6	4.33	1.74	5.6	164	95	69.82	34.69	286	0.87	3	Yes	Yes	Yes	Yes	No	No	No	No
62	Male	80	10	P. aeruginosa(MDROs)	26	5.87	1.89	11.3	159	97	88.03	75.32	242	0.79	4	Yes	Yes	Yes	Yes	Yes	Yes	Yes	Yes
63	Male	49	12	P. aeruginosa(MDROs)	6	4.39	1.02	5.7	136	73	10.46	25.16	185	0.96	1	No	No	No	No	No	No	No	No
64	Female	58	32	P. aeruginosa(MDROs)	13	2.1	0.56	8.9	135	72	78.19	47.11	119	0.77	3	Yes	Yes	Yes	Yes	No	No	No	No
65	Female	66	11	P. aeruginosa(MDROs)	12	3.92	0.69	10.3	130	78	82.11	78.24	272	0.58	4	Yes	Yes	Yes	Yes	Yes	No	Yes	Yes
66	Male	64	11	P. aeruginosa(MDROs)	14	2.88	0.58	9.4	148	82	74.67	53.32	257	0.67	3	Yes	Yes	Yes	Yes	No	No	No	No
67	Male	48	56	P. aeruginosa(MDROs)	6	4.35	1.48	7.6	120	70	68.43	38.2	274	0.96	3	Yes	Yes	Yes	Yes	No	No	Yes	No
68	Female	45	52	Staphylococcus epidermidis（MDROs）	3	5.63	1.93	9.7	130	79	38.06	19.23	203	0.99	1	No	No	No	No	No	No	No	No
69	Male	54	9	Staphylococcus epidermidis（MDROs）	8	4.69	2.05	7.9	136	83	74.32	34.72	263	0.87	3	Yes	Yes	Yes	Yes	No	No	Yes	No
70	Female	69	23	Citrobacter Werkman and Gillen（MDROs）	22	7.58	2.87	5.8	139	87	77.6	36.18	258	0.46	4	Yes	Yes	Yes	Yes	Yes	Yes	Yes	Yes
71	Male	69	49	Acinetobacter baumannii（MDROs）	10	3.91	1.86	10.3	114	60	43.53	18.67	226	0.96	2	Yes	No	Yes	No	Yes	Yes	Yes	No
NMDROs Group											65.04±24.75
Serial number	Gender	Age	Hospital stays (days)	Infecting bacteria	History of diabetes	Cholesterol	TG(mmol/L)	HbA1c（%）	Systolic pressure	Diastolic pressure（mmHg）					Wagner分级	既往Previous history of antimicrobial exposure	Osteomyelitis	Peripheral neuropathy	Neuroischemic wounds	Diabetic Nephropathy	Retinopathy	Hospitalization for the same ulcer >2 times/year	Toe/Limb amputation
1	Female	47	33	Enterococcus faecalis	15	4.94	1.32	10.3	167	90	33.64	28.47	241	0.98	1	No	No	Yes	No	Yes	Yes	No	No
2	Male	46	5	Staphylococcus aureus	10	2.22	1.02	7.3	159	86	45.34	36.74	221	0.89	2	Yes	No	Yes	No	No	Yes	No	No
3	Male	71	28	Enterococcus faecalis	6	1.77	0.86	7.1	140	100	38.19	28.96	187	1.04	1	No	No	No	No	No	No	No	No
4	Female	59	22	Staphylococcus hominis human subspecies	18	4.69	1.17	7.8	164	81	45.87	42.11	268	0.86	2	No	No	Yes	No	Yes	No	No	No
5	Male	69	59	P. aeruginosaMorganella subspecies	30	2.25	4.78	8.7	112	65	88.93	69.53	346	0.49	4	Yes	Yes	Yes	Yes	Yes	Yes	Yes	No
6	Male	75	28	Streptococcus	10	3.28	1.23	11.2	180	96	46.1	25.83	263	1.08	2	No	No	Yes	No	No	No	No	No
7	Female	45	31	Providencia	3	2.39	0.97	6.5	154	60	40.04	23.6	201	1.04	1	No	No	No	No	Yes	Yes	No	No
8	Male	70	16	Proteusmirabilis	7	2.11	1.56	9.4	121	90	48.15	40.62	229	0.95	2	No	No	Yes	No	No	Yes	No	No
9	Female	76	19	Proteus penneri	10	4.83	0.95	11.3	173	82	49.39	38.93	236	0.8	2	No	No	Yes	No	No	No	No	No
10	Female	53	67	Citrobacter fowleri	13	3.99	1.82	10.8	168	50	40.9	27.18	253	1.08	1	No	No	Yes	No	No	Yes	No	No
11	Male	47	42	S. dysgalactiae equisimilis	10	7.69	0.84	7.6	141	85	60.38	48.33	269	0.78	3	Yes	No	Yes	Yes	No	No	No	No
12	Female	72	20	E. coliPrzewalskii spp	23	4.83	1.77	6.9	164	102	149.39	109.49	380	0.31	5	Yes	Yes	Yes	Yes	Yes	Yes	Yes	Yes
13	Male	64	16	Klebsiella phytogenes	10	5.99	2.91	7.9	180	100	35.68	22.5	198	0.96	1	No	No	Yes	No	No	No	No	No
14	Female	60	14	P. aeruginosa	8	4.77	2.73	10.2	121	82	35.68	38.49	253	0.77	2	Yes	No	No	No	Yes	No	No	No
15	Male	77	26	Enterococcus quail	20	7.01	2.49	8.6	128	55	39.2	19.23	224	1.01	1	Yes	No	Yes	No	Yes	Yes	Yes	No
16	Female	37	45	Enterococcus faecalis	10	3.89	0.87	8.4	112	66	36.89	34.72	205	1.06	1	No	No	Yes	No	No	No	No	No
17	Male	64	9	Klebsiella pneumoniae pneumonia subspeciess	10	6.99	2.63	9.2	180	100	88.46	58.07	283	0.63	3	Yes	No	Yes	Yes	Yes	No	No	No
18	Male	56	6	Proteusmirabilis	10	5.99	1.91	5.6	172	76	41.04	28.64	174	0.96	1	Yes	No	Yes	No	No	No	No	No
19	Male	47	21	Streptococcus granulosus abutus	5	3.95	1.15	9.1	147	83	50.63	44.83	234	0.76	2	No	No	Yes	No	No	No	No	No
20	Female	71	12	Klebsiella pneumoniae pneumonia subspeciess	23	6.34	1.03	6.9	147	86	52.1	39.05	216	0.85	2	Yes	No	Yes	No	Yes	Yes	No	No
21	Male	64	22	Streptococcus	16	3.62	1.11	8.1	104	69	66.29	47.28	275	0.57	3	No	No	Yes	Yes	No	No	No	No
22	Male	44	8	Streptococcus granulosus abutus	10	3.78	1.04	7.3	130	86	47.83	36.48	241	0.48	2	No	No	Yes	No	No	No	No	No
23	Male	56	19	Enterococcus avium	8	4.88	1.76	12.5	118	98	53.39	22.98	206	0.76	2	No	No	Yes	No	No	No	No	No
24	Male	69	20	Klebsiella pneumoniae pneumonia subspeciess	6	4.22	0.88	10.4	145	73	60.67	10.34	185	0.67	1	No	No	No	No	No	No	No	No
25	Male	70	35	E. coli	10	3.46	0.95	7.8	139	76	39.3	42.18	263	0.98	2	No	No	Yes	No	No	No	No	No
26	Male	47	15	Proteus species	10	2.48	0.86	11.3	116	78	39.11	26.06	206	1.08	1	Yes	No	Yes	No	Yes	Yes	No	No
27	Male	64	33	Morganella morgani subspecies	20	5.76	1.32	7.3	141	70	144.46	79.46	368	0.28	5	Yes	Yes	Yes	Yes	Yes	Yes	Yes	Yes
28	Female	73	28	S. dysgalactiae equisimilis	11	4.73	1.17	11.5	144	84	30.98	28.15	157	1.1	1	Yes	No	Yes	No	No	No	No	No
29	Male	58	18	S. constella subsp constellatus	6	3.86	1.61	6.4	139	70	40.87	17.49	218	0.78	1	No	No	No	No	No	No	No	No
30	Female	69	23	E. coli	20	7.42	2.73	8.1	155	66	97.03	47.69	330	0.46	4	Yes	Yes	Yes	Yes	Yes	Yes	Yes	No
31	Male	56	10	P. aeruginosa	20	3.23	0.91	6.7	165	89	78.76	34.21	287	0.57	3	Yes	No	Yes	No	Yes	Yes	Yes	Yes
32	Male	67	22	Staphylococcus haemolyticus	15	2.94	0.77	10.9	117	58	37.04	10.57	231	1.03	1	No	No	Yes	No	No	Yes	Yes	No
33	Female	43	28	Enterobacter cloacae	1	3.95	0.83	6	143	83	42.58	38.95	204	0.97	1	No	No	No	No	No	No	No	No
34	Female	75	16	Staphylococcus aureus	22	6.93	2.45	7.9	137	79	98.05	89.46	277	0.44	4	Yes	Yes	Yes	Yes	Yes	Yes	Yes	No
35	Male	54	18	C.lipolytica	6	4.31	1.52	8.8	160	75	28.83	27.94	241	0.93	1	Yes	No	No	No	No	No	No	No
36	Male	54	14	S. dysgalactiae equisimilis	12	3.95	0.72	10.2	159	100	78.49	75.48	275	0.59	3	Yes	No	Yes	Yes	No	No	No	No
37	Male	77	8	Enterococcus faecalis	10	2.77	0.93	6.8	119	58	109.78	88.46	294	0.68	4	No	No	Yes	Yes	No	No	No	No
38	Male	66	15	Streptococcus agalactis	16	6.44	0.96	6.5	134	79	119.06	74.23	318	0.36	4	Yes	Yes	Yes	Yes	Yes	Yes	No	Yes
39	Male	65	29	Morganella morgani subspecies	10	2.41	1.79	9.3	147	85	49.22	18.95	213	1.02	1	No	No	No	No	No	No	No	No
40	Female	61	23	S. constella subsp constellatus	10	3.49	1.47	7	144	66	78.4	25.68	288	0.67	3	No	No	Yes	No	Yes	No	Yes	No
41	Male	79	20	Staphylococcus haemolyticus	13	3.49	0.81	5.8	139	80	57.89	33.16	254	0.78	2	No	No	Yes	No	No	No	No	No
42	Male	63	12	Proteusmirabilis	6	3.65	0.92	8.5	109	63	63.29	42.16	256	0.85	2	No	No	Yes	No	No	No	No	No
43	Male	84	13	Proteusmirabilis	13	3.37	0.83	9.7	116	58	46.23	24.64	245	0.61	2	Yes	No	Yes	No	Yes	No	Yes	No
44	Female	69	47	P. aeruginosa	14	5.93	1.55	11.4	149	86	38.89	28.65	238	0.65	2	No	No	Yes	No	Yes	No	No	No
45	Male	77	5	Proteusmirabilis	8	3.27	0.79	10.3	128	80	56.89	17.32	267	0.98	2	No	No	No	No	No	No	No	No
46	Male	67	12	Enterococcus faecalis、Proteusmirabilis	10	5.79	1.59	6.4	137	87	86.89	34.65	284	0.5	3	Yes	No	Yes	Yes	Yes	No	No	No
47	Male	54	14	Proteus species	6	1.88	0.84	8.2	123	76	46.98	10.67	196	1.15	1	No	No	No	No	No	No	No	No
48	Female	85	20	Enterobacter cloacae	26	6.72	1.43	7.3	138	85	78.04	32.49	274	0.59	3	Yes	Yes	Yes	Yes	Yes	Yes	Yes	Yes
49	Female	59	12	Staphylococcus aureusChromogenic Staphylococcus	8	3.08	1.15	9.6	125	83	45.38	12.78	222	0.95	1	Yes	No	No	Yes	Yes	No	No	No
50	Female	63	38	Staphylococcus cohnii subsp	10	4.33	0.89	8.1	137	84	78.9	40.23	254	0.54	3	Yes	Yes	Yes	Yes	No	No	Yes	No
51	Male	66	20	Enterobacter cloacae	12	4.97	0.93	9.4	163	78	42.89	13.65	186	0.89	1	No	No	No	No	No	No	No	No
52	Male	57	14	Staphylococcus aureus	13	5.22	1.56	8.3	157	98	90.43	43.17	267	0.47	3	Yes	No	Yes	Yes	No	No	No	No
53	Male	57	10	Staphylococcus aureus	7	2.93	0.84	8	136	95	19.78	23.13	205	0.89	1	No	No	No	No	No	No	No	No
54	Male	55	37	Acinetobacter	4	3.82	0.73	10.6	152	94	97.08	43.26	274	0.67	3	Yes	No	Yes	Yes	No	No	No	No
55	Male	70	15	Staphylococcus aureus	11	7.46	2.67	6.4	136	78	108.89	54.34	295	0.5	4	Yes	Yes	Yes	Yes	Yes	No	Yes	Yes
56	Male	71	14	Achromobacter	8	2.62	0.87	7.9	132	72	39.01	10.68	183	0.97	1	No	No	No	No	Yes	No	No	No
57	Male	56	19	Enterococcus faecalis	4	4.75	1.46	9.3	143	87	48.06	14.68	248	0.89	2	No	No	Yes	No	No	No	No	No
58	Male	49	10	Streptococcus porcinus	5	1.89	1.37	8.4	138	84	39.89	22.47	207	1.07	1	No	No	Yes	No	No	No	No	No
59	Male	36	9	Proteus species	3	2.76	0.79	8.9	146	88	43.78	28.96	213	1.16	2	No	No	No	No	No	No	No	No
60	Female	62	33	Raoultella、E. coli	16	5.33	0.94	10.3	157	92	43.87	33.75	253	0.88	3	Yes	No	Yes	Yes	Yes	No	No	No
61	Male	50	11	P. aeruginosa	7	4.17	1.46	7.9	135	84	46.56	18.94	197	1.17	1	No	No	Yes	No	No	No	No	No
62	Male	77	11	Streptococcus angina	25	5.69	2.35	9.6	164	103	98.66	78.94	288	0.67	4	Yes	Yes	Yes	Yes	Yes	No	Yes	No
63	Male	37	19	Klebsiella pneumoniae pneumonia subspeciess	2	1.16	0.89	10.3	136	85	30.12	12.46	210	1.18	1	No	No	No	No	No	No	No	No
64	Male	72	13	S. constellatus	24	6.34	1.73	8.2	174	109	87.49	76.94	315	0.49	4	Yes	Yes	Yes	Yes	Yes	Yes	Yes	Yes
65	Male	58	25	S. dysgalactiae equisimilis	12	3.14	1.12	9.3	152	97	36.41	11.48	231	0.98	1	No	No	No	No	No	No	No	No
66	Female	61	10	E. coli	5	2.19	0.71	6.7	128	83	40.89	27.64	224	1.08	1	No	No	Yes	No	No	No	No	No
67	Male	70	13	Staphylococcus aureus	13	4.62	1.01	7.3	147	86	86.38	33.28	273	0.87	3	Yes	No	Yes	Yes	Yes	No	No	No
68	Male	64	22	Staphylococcus aureus	7	2.01	0.56	5.3	145	87	36.78	11.85	210	1.07	1	Yes	No	No	No	No	No	No	No
69	Female	68	24	E. coli	17	5.26	1.22	9.7	128	83	128.67	84.34	261	0.45	4	Yes	Yes	Yes	Yes	Yes	Yes	Yes	Yes
70	Female	72	15	Staphylococcus	14	3.44	0.62	7.9	179	108	54.73	22.75	251	1.08	2	Yes	No	Yes	No	No	No	No	No
71	Male	74	8	Staphylococcus aureus	16	3.67	0.84	8.3	157	94	42.98	11.64	200	1.17	1	No	No	No	No	Yes	No	No	No
72	Female	69	13	Staphylococcus aureus	10	2.06	1.03	8.2	145	87	78.9	22.45	231	0.97	3	No	No	Yes	No	No	No	No	No
73	Male	82	9	Morganella morgani subspecies	26	4.86	1.93	9.4	178	106	103.76	46.89	275	0.58	4	Yes	Yes	Yes	Yes	Yes	Yes	Yes	Yes
74	Female	76	13	P. aeruginosaProteusmirabilis	24	5.94	0.67	9.6	168	101	89.88	53.43	286	0.39	4	Yes	Yes	Yes	Yes	Yes	Yes	Yes	Yes
75	Female	58	12	Klebsiella pneumoniae pneumonia subspeciess	10	2.14	1.26	8.6	138	83	34.82	27.15	263	1.05	2	No	No	No	No	No	No	No	No
76	Male	46	21	P. aeruginosa	2	2.02	1.32	6.3	136	95	38.49	16.58	176	1.18	1	No	No	No	No	No	No	No	No
											60.12±28.62
